## Erratum

Kinetics of branchial calcium uptake in the rainbow trout: effects of acclimation to various external calcium levels

By S. F. PERRY AND C. M. WOOD

*J. exp. Biol.* **116**, 411–433.

This replaces the printed version on page 421 of this paper.

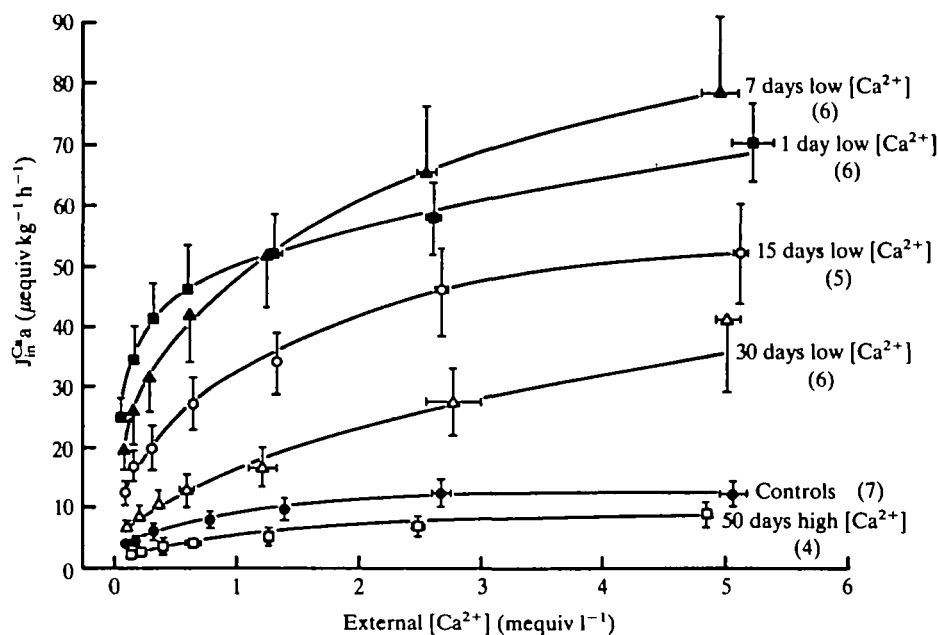

Fig. 2. The effects of low and high  $[Ca^{2+}]$  acclimation for various periods on the kinetics of  $Ca^{2+}$  transport across the arterio-arterial circulation ( $J_m^{Ca}$ ) in the perfused trout head during progressive increases of external  $[Ca^{2+}]$ . Numbers in parentheses indicate number of fish examined. All values are means  $\pm 1 \text{ S.E.}$
